# Supplementary material
Source: publisher site journal article supplement (https://www.dovepress.com/article/221383)
Supplement: Supplementary file 1 [file get_supplementary_file.php]

## Supplementary Tables and Figures

**Supplementary Table S1. Clinico-pathological baseline factors for 19 patients**

| Clinical parameter                | n  | %     |
|-----------------------------------|----|-------|
| <b>Age (years)</b>                |    |       |
| ≤60                               | 5  | 26.32 |
| >60                               | 14 | 73.58 |
| <b>Sex</b>                        |    |       |
| Male                              | 9  | 47.37 |
| Female                            | 10 | 52.63 |
| <b>Histologic differentiation</b> |    |       |
| Poor                              | 11 | 57.89 |
| Moderately                        | 7  | 36.84 |
| Well                              | 1  | 5.27  |
| <b>TNM stages</b>                 |    |       |
| I                                 | 1  | 5.26  |
| II                                | 0  | 0     |
| IIIA                              | 3  | 15.79 |
| IIIB+IV                           | 15 | 78.95 |
| <b>Histology type</b>             |    |       |
| Squamous                          | 5  | 26.32 |
| Adenocarcinoma                    | 13 | 68.42 |
| Other                             | 1  | 5.48  |

**Supplementary Table S2**

Analyses of hsa-miR-425-3p promoter regions (-2kb upstream to +1)

| Matrix ID | Name     | Score   | Start | End | Strand | Predicted site Sequence |
|-----------|----------|---------|-------|-----|--------|-------------------------|
| MA0059.1  | MAX::MYC | 10.1533 | 685   | 695 | -      | aaccacctggc             |
|           |          | 10.0231 | 684   | 694 | +      | ggccaggtggt             |
|           |          | 9.51871 | 818   | 828 | +      | aagcgcgtgga             |
|           |          | 8.78067 | 340   | 350 | +      | gaacacctggc             |
|           |          | 8.78067 | 464   | 474 | +      | gaacacctggc             |
|           |          | 8.76116 | 445   | 455 | +      | gccacctggt              |
|           |          | 8.04669 | 446   | 456 | -      | gaccaggtggg             |

When the luciferase reporter vector containing the mutant c-Myc binding sequences was constructed, the sequences shown in red were deleted.

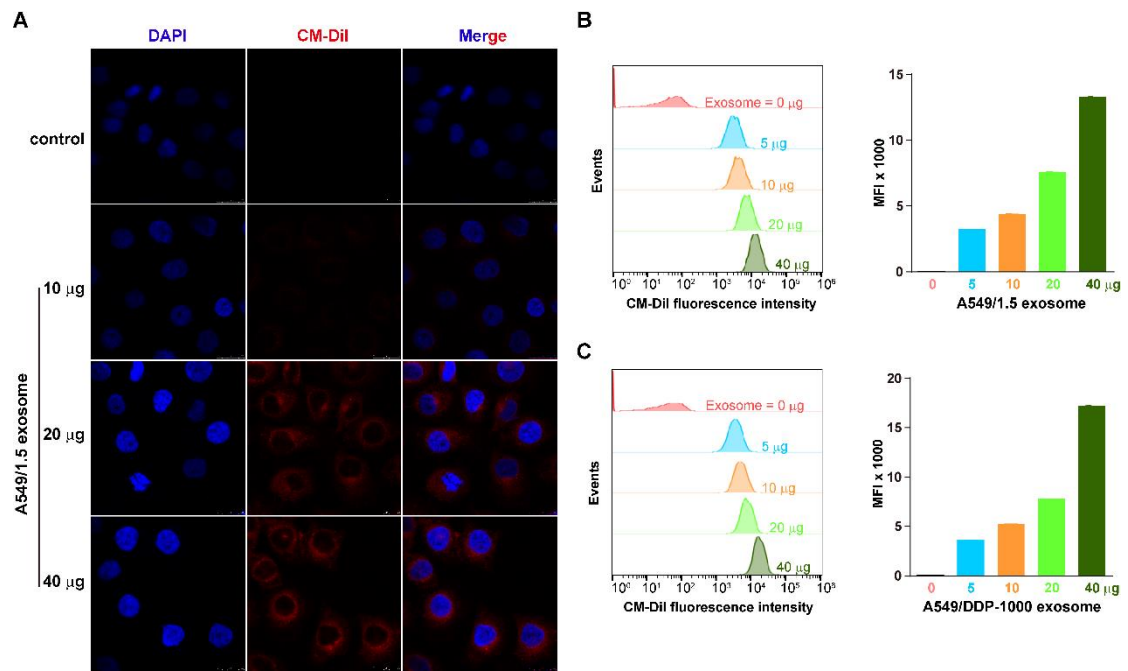

**Supplementary Figure S1 A dose-dependent internalization of CM-Dil-labeled exosomes by A549 cells.** (A) Representative confocal microscopy image showing the internalization of CM-Dil-labeled exosomes (red) by A549 cells. (B) Quantitative analysis for the internalization of CM-Dil-labeled A549/1.5 exosomes using FACS. (C) Quantitative analysis for the internalization of CM-Dil-labeled A549/DDP-1000 exosomes using FACS.
